# Supplementary material for: Energy system transformations for limiting end-of-century warming to below 1.5 °C
Source: Springer Nature journal article supplement (doi:10.1038/nclimate2572), 2015-05-20
Supplement: 41558_2015_BFnclimate2572_MOESM427_ESM.pdf [file 41558_2015_BFnclimate2572_MOESM427_ESM.pdf]

# Energy system transformations for limiting end-of-century warming to below 1.5°C

Joeri Rogelj<sup>1,2,\*</sup>, Gunnar Luderer<sup>3,\*</sup>, Robert C. Pietzcker<sup>3</sup>, Elmar Kriegler<sup>3</sup>, Michiel Schaeffer<sup>4,5</sup>, Volker Krey<sup>1</sup>,  
Keywan Riahi<sup>1,6</sup>

<sup>1</sup> Energy Program, International Institute for Applied Systems Analysis (IIASA), Laxenburg, Austria

<sup>2</sup> Institute for Atmospheric and Climate Science, ETH Zurich, Zurich, Switzerland

<sup>3</sup> Potsdam Institute for Climate Impact Research (PIK), Potsdam, Germany

<sup>4</sup> Climate Analytics, Potsdam, Germany

<sup>5</sup> Environmental Systems Analysis Group, Wageningen University and Research Centre, Wageningen  
The Netherlands

<sup>6</sup> Graz University of Technology, Graz, Austria

\* Correspondence and requests for materials  
should be addressed to JR (rogelj@iiasa.ac.at) or GL (luderer@pik-potsdam.de).

# TABLE OF CONTENTS

|                                                        |    |
|--------------------------------------------------------|----|
| <b>Supplementary figures</b> .....                     | 3  |
| <b>Supplementary tables</b> .....                      | 14 |
| <b>Supplementary text 1</b> .....                      | 17 |
| <b>Relationship to IPCC AR5 1.5°C assessment</b> ..... | 17 |
| <b>Supplementary references</b> .....                  | 18 |

# SUPPLEMENTARY FIGURES

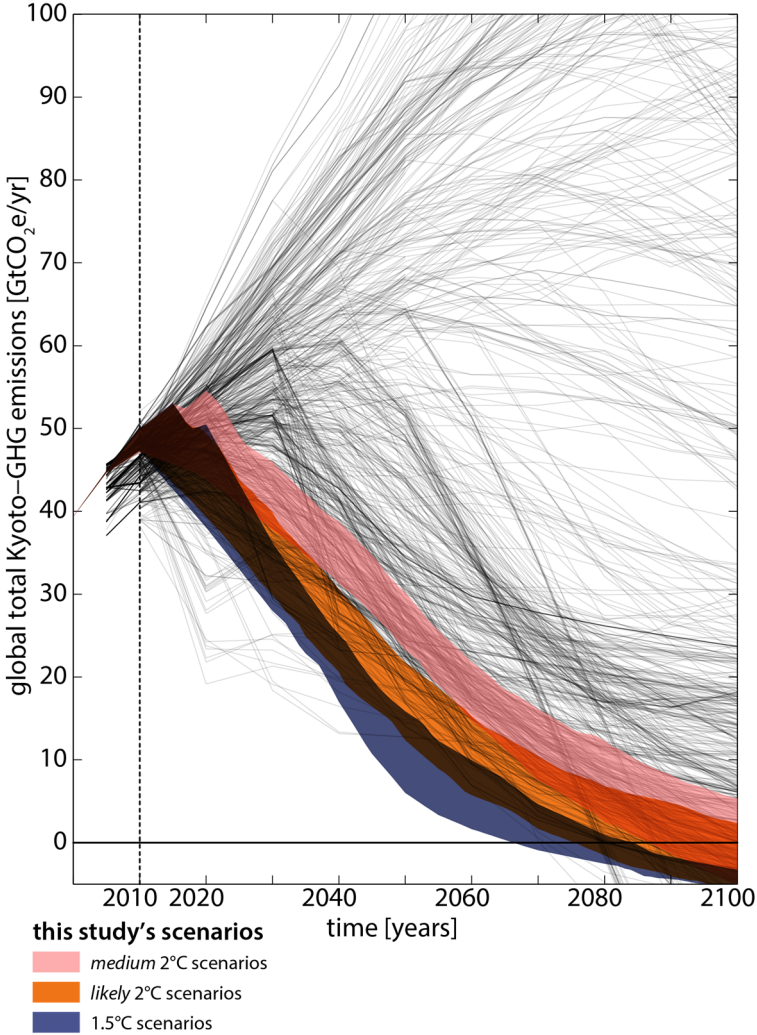

**Supplementary Figure 1 | Emission profiles of 1.5°C-consistent scenarios.** Total global annual Kyoto-basket emissions over time (GWP-100 weighted). Ranges represent the 15<sup>th</sup>-85<sup>th</sup> percentile of scenarios in our set that limit warming during the 21<sup>st</sup> century below 2°C with 50-66% (*medium 2°C scenarios*, pink) and >66% chance (*likely 2°C scenarios*, orange), and in 2100 below 1.5°C with >50% chance (*1.5°C scenarios*, blue). Thin black lines are scenarios included in the IPCC AR5 scenario database.

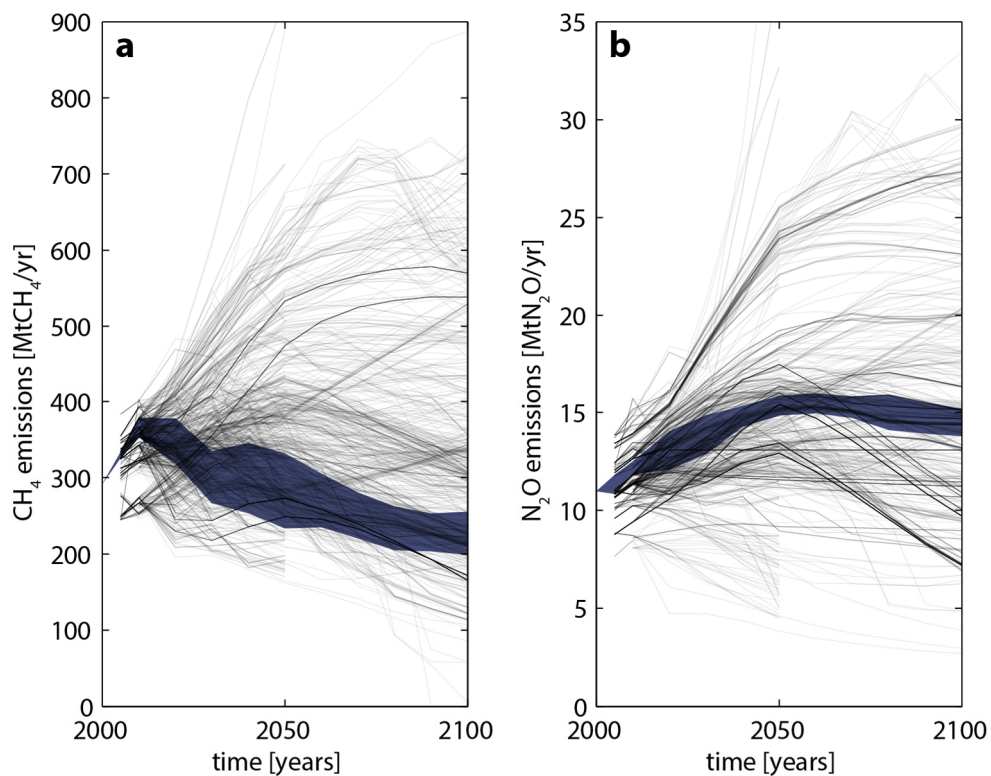

**Supplementary Figure 2 | Non-CO<sub>2</sub> emission profiles of 1.5°C-consistent emission pathways.**

Emission ranges (min-max) of methane ( $CH_4$ , left) and nitrous-oxide ( $N_2O$ , right) emissions from scenarios that limit warming to below 1.5°C by 2100 with at least 50% chance (dark blue range) on a backdrop of all emission trajectories available in the IPCC AR5 scenario database (thin black lines).

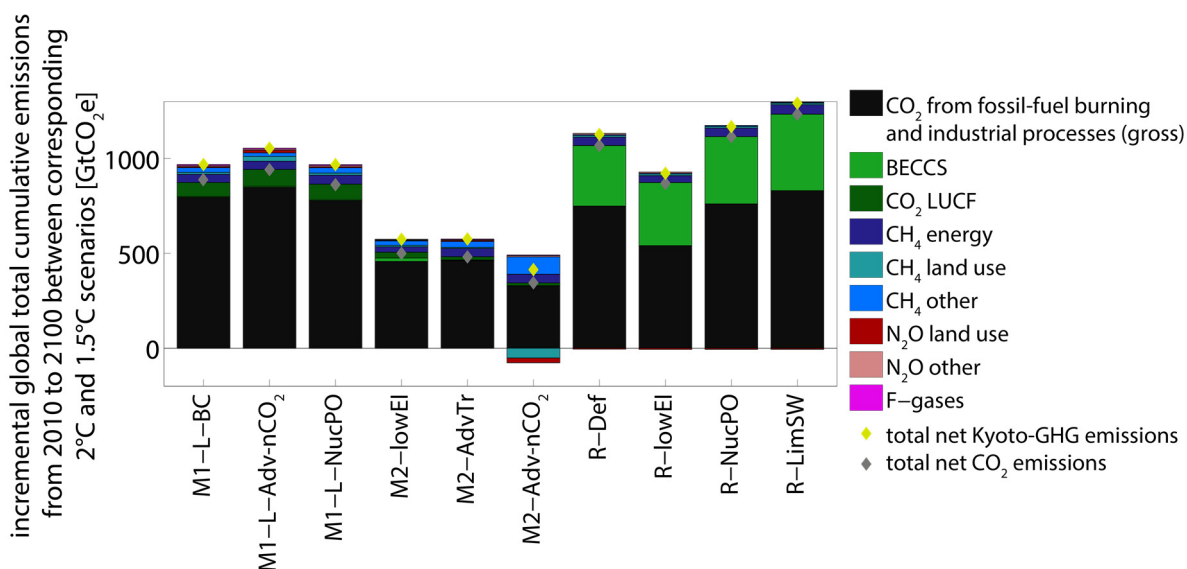

**Supplementary Figure 3 | Sectorial breakdown of greenhouse gas emissions.** Incremental emissions reductions in 1.5°C scenarios beyond those performed in corresponding 2°C-consistent scenarios. Detailed explanations of the scenarios labels are provided in Supplementary Table 4. Non-CO<sub>2</sub> gases account for more than half of the cumulative GWP-100-weighted CO<sub>2</sub>-equivalent emissions between 2010 and 2100 in 1.5°C-consistent scenarios. This is because emissions from certain non-CO<sub>2</sub> sources are particularly hard to mitigate (for example CH<sub>4</sub> emissions from land use). Incremental emission reductions between corresponding 2°C and 1.5°C scenarios are dominated by reductions in CO<sub>2</sub> emissions through reduced fossil-fuel use, higher deployment of BECCS and increased land-use sinks, which combined account for more than 90% of incremental emissions reductions. CO<sub>2</sub>-equivalence is defined by means of the AR4 GWP-100 metric.

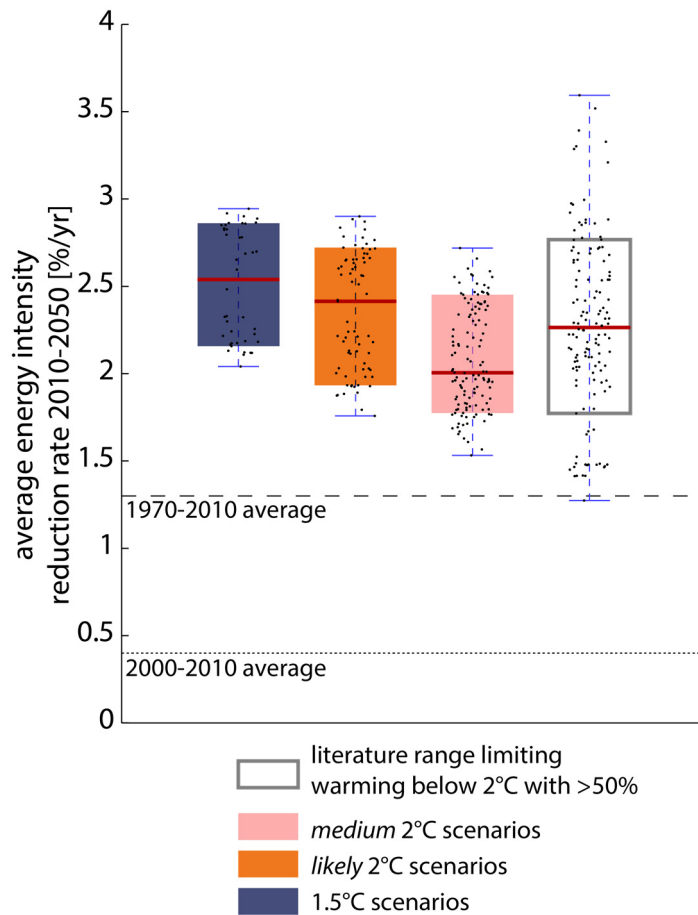

**Supplementary Figure 4 | Energy intensity improvements.** Average global final energy intensity improvements from 2010 to 2050. Box plots show the median (red line), the 15<sup>th</sup> to 85<sup>th</sup> percentile range (box), and the minimum-maximum range (whiskers). Dots represent single scenarios. Dashed and dotted horizontal lines indicate 1970-2010 and 2000-2010 average values based on data from the International Energy Agency (IEA) and the World Bank.

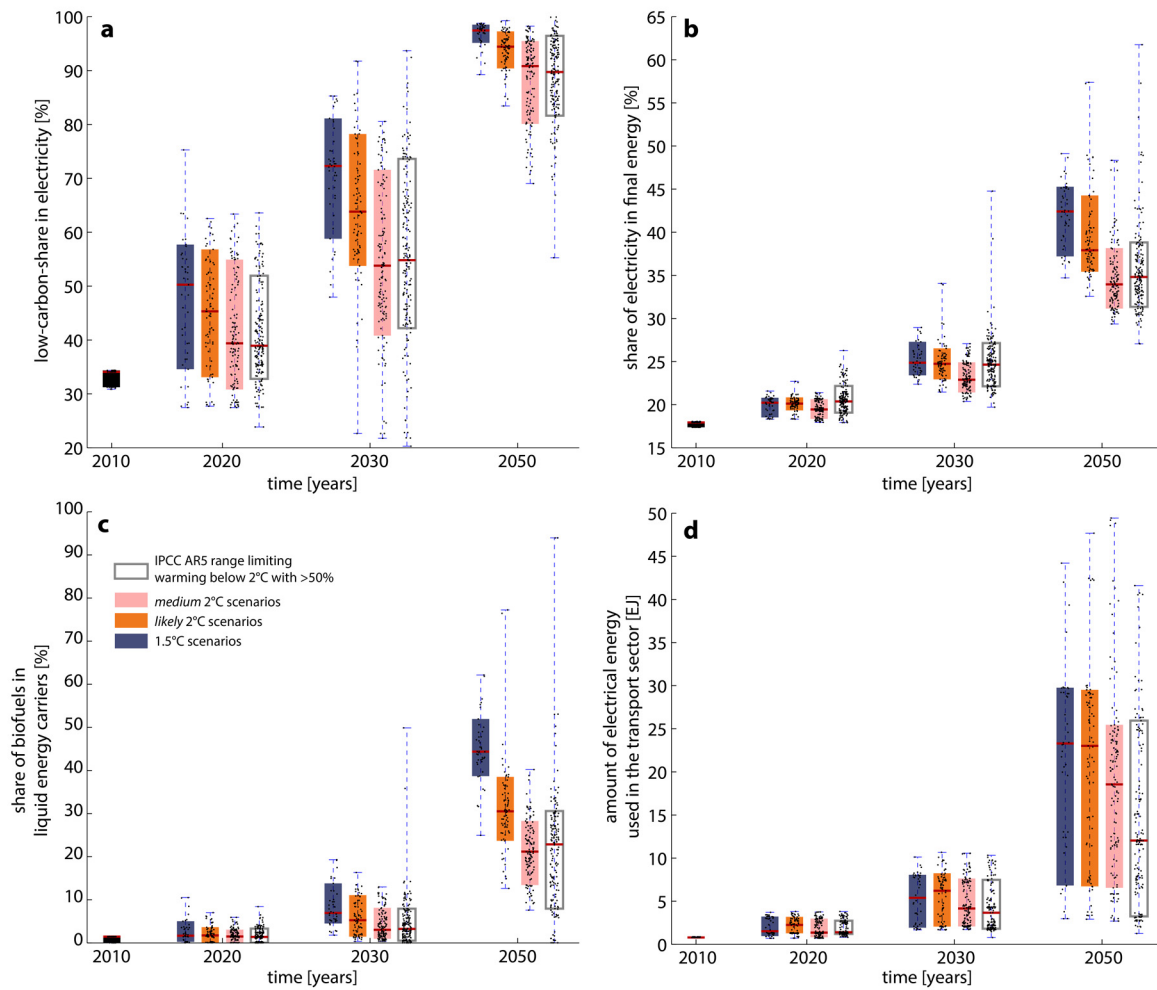

**Supplementary Figure 5 | Decarbonisation indicators for 1.5°C-consistent scenarios.** (a) Share of low-carbon energy in global electricity generation. “low-carbon” is here defined as renewable, nuclear and CCS; (b) share of electricity in final global energy; (c) share of biofuels in global final energy; (d) total amount of electrical energy used in the global transport sector. Box plots show the median (red line), the 15<sup>th</sup> to 85<sup>th</sup> percentile range (box), and the minimum-maximum range (whiskers). Dots represent single scenarios.

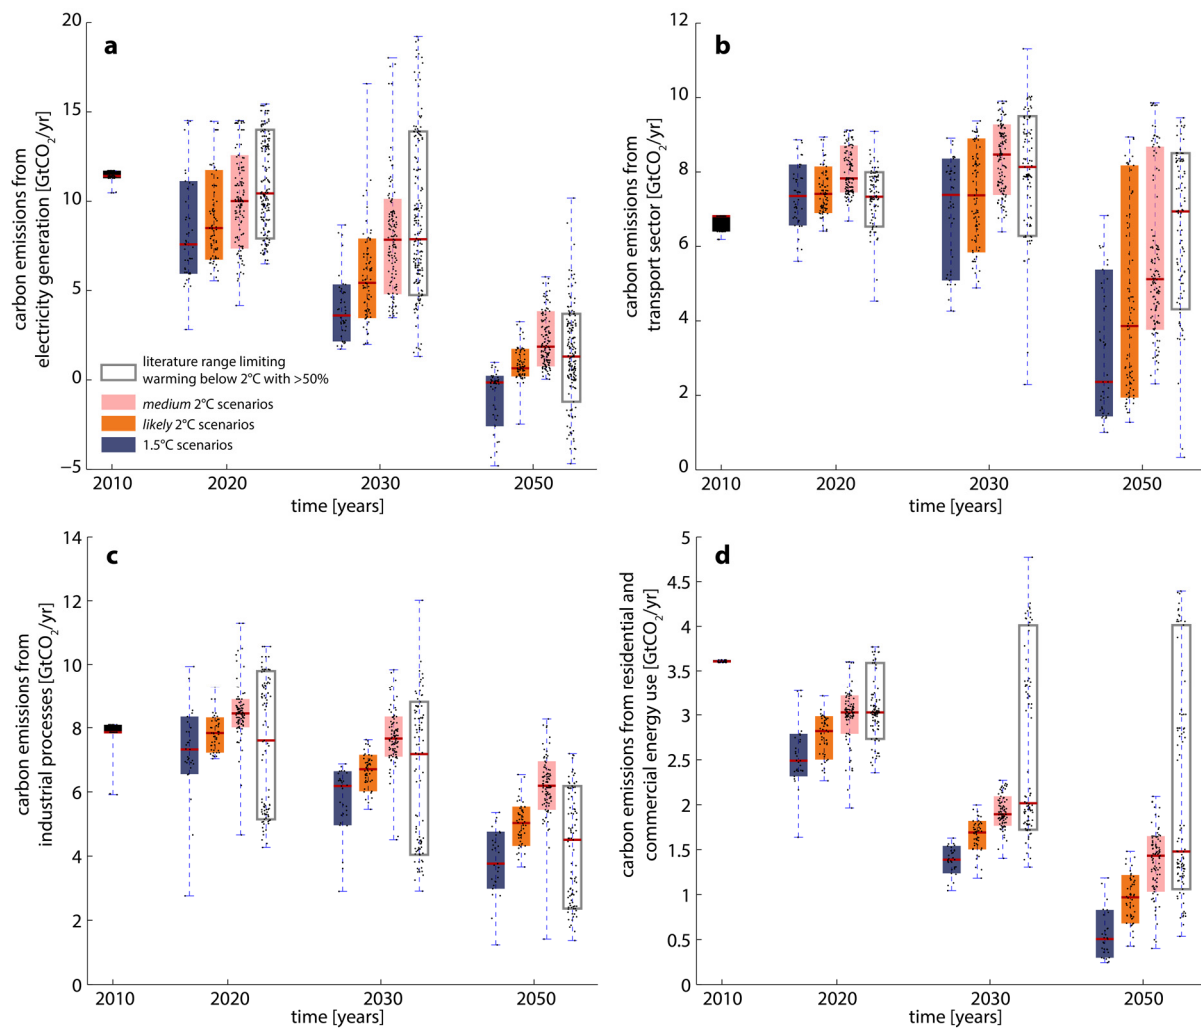

**Supplementary Figure 6 | Sectorial breakdown of energy-related CO<sub>2</sub> emissions.** (a) Carbon emissions resulting from global electricity generation; (b) direct carbon emissions generated by the global transport sector; (c) global direct carbon emissions resulting from industrial processes (like cement production); (d) direct carbon emissions from global residential and commercial energy use. Box plots show the median (red line), the 15<sup>th</sup> to 85<sup>th</sup> percentile range (box), and the minimum-maximum range (whiskers). Dots represent single scenarios. Note that indirect emissions, i.e. emissions from the energy supply sector for (electrical) energy consumed by end-use sectors, are not included here in the sector emissions.



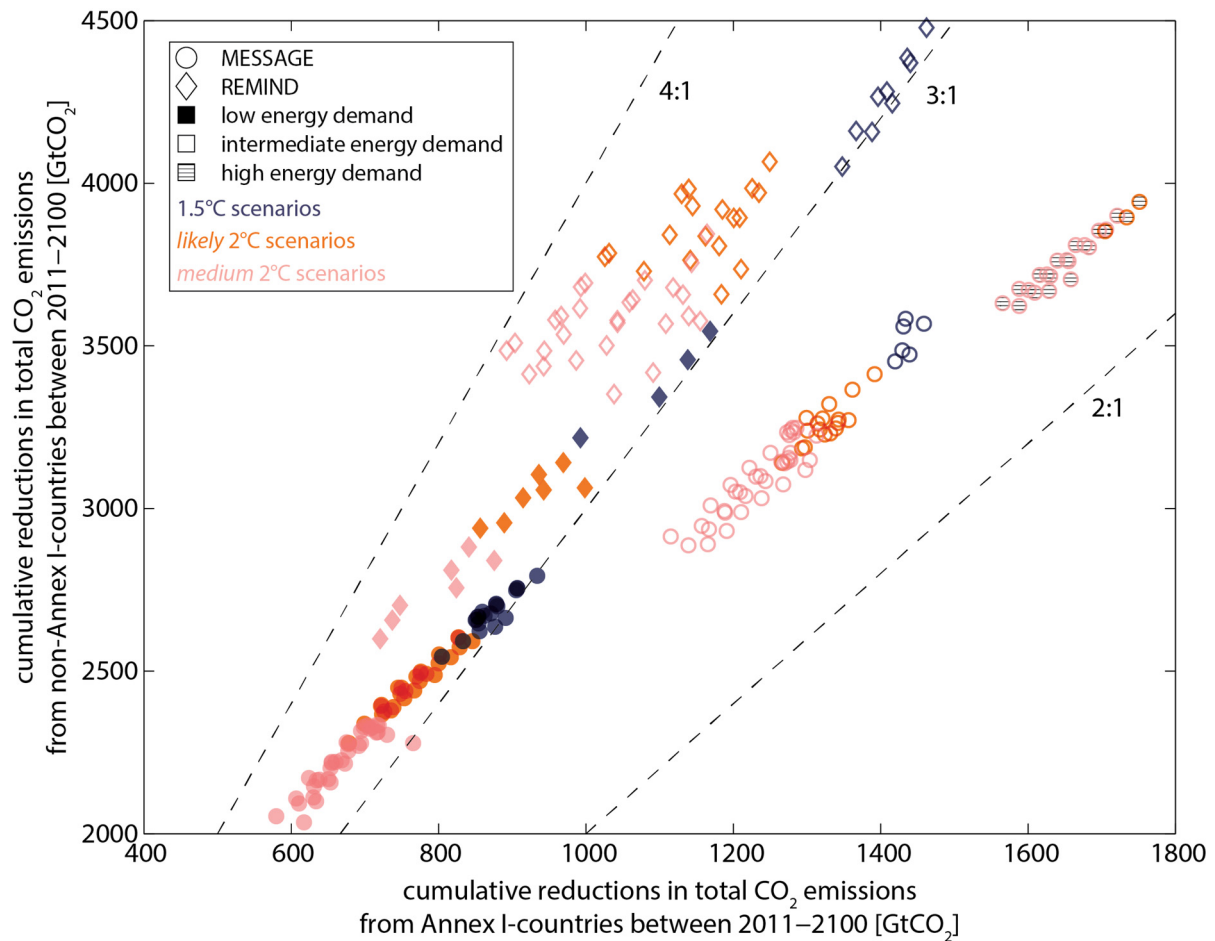

**Supplementary Figure 7 | Comparison of cumulative CO<sub>2</sub> reductions in Annex I and non-Annex I countries.** Regional (Annex I vs. non-Annex I) cumulative CO<sub>2</sub> emission reductions are calculated as difference between baseline emissions (in the virtual absence of future climate policies) and emissions in the 1.5°C and 2°C scenarios cumulated over the period 2011–2100. Mitigation measures which countries would have implemented before 2011 are accounted for in the baseline emissions of these countries.

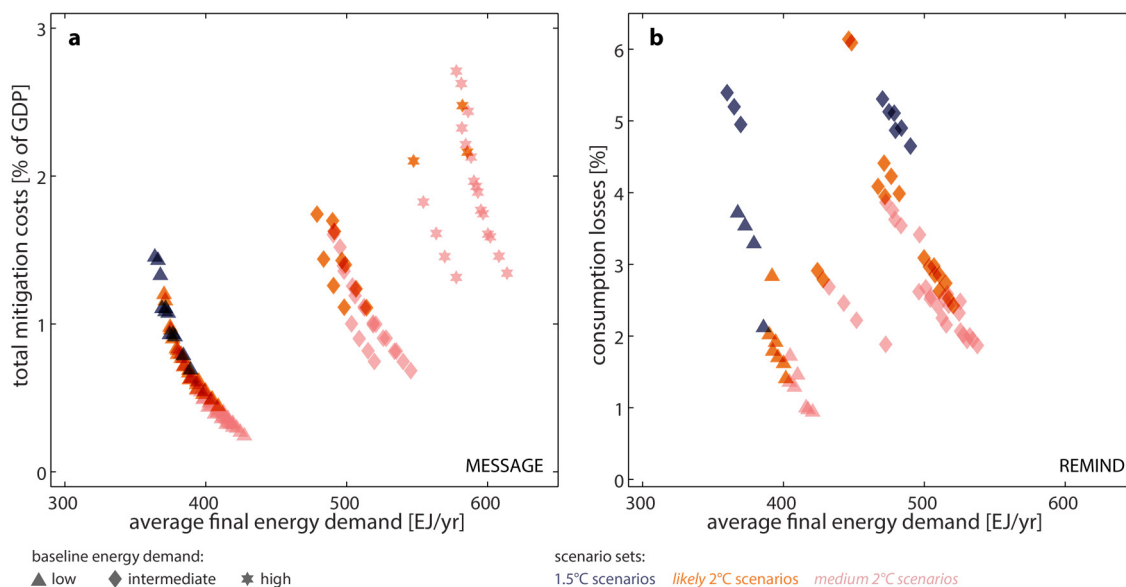

**Supplementary Figure 8 | Mitigation costs for 1.5 and 2°C scenarios.** Aggregated, discounted mitigation costs from 2010-2100 (discount rate 5%) as a function of the average final energy demand from 2010 to 2100. Scenarios are coded in function of the underlying baseline energy demand evolution (low, intermediate and high represented by triangles, diamonds, and stars, respectively), their probability of limiting warming to particular temperature levels (pink, orange and blue). Panel **a** provides total mitigation costs from the MESSAGE model scenarios, and panel **b** provides consumption losses for the scenarios from the REMIND model. The mitigation costs methodology is described in the Methods section.

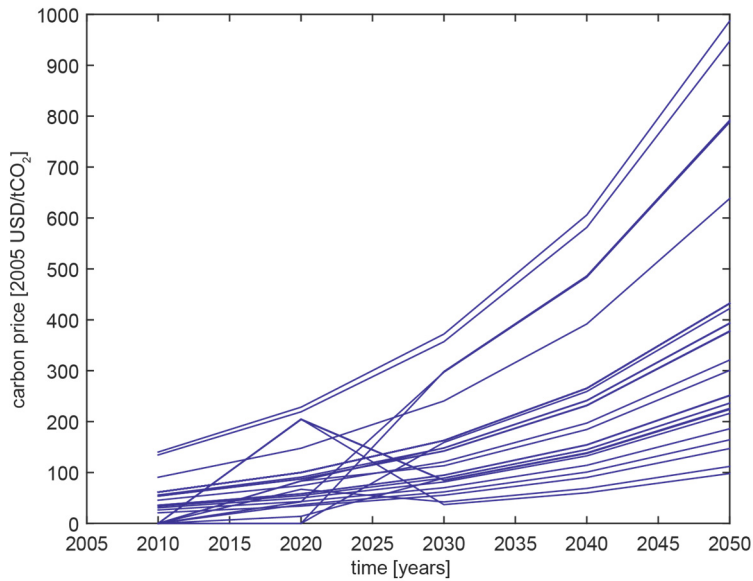

**Supplementary Figure 9 | Carbon price time series for 1.5°C consistent scenarios.** Equivalent carbon prices are provided in 2005 USD/tCO<sub>2</sub>. Most 1.5°C scenarios in our set initiated mitigation in 2010, with carbon prices ramping up during until 2050. Only few scenarios are available that still have a zero carbon price by 2020. The temporary peak in carbon prices around 2020 is present in scenarios that impose emission reductions in the near term (by 2020), which are more stringent than what a least-cost approach would require. Therefore carbon prices decline again afterward.

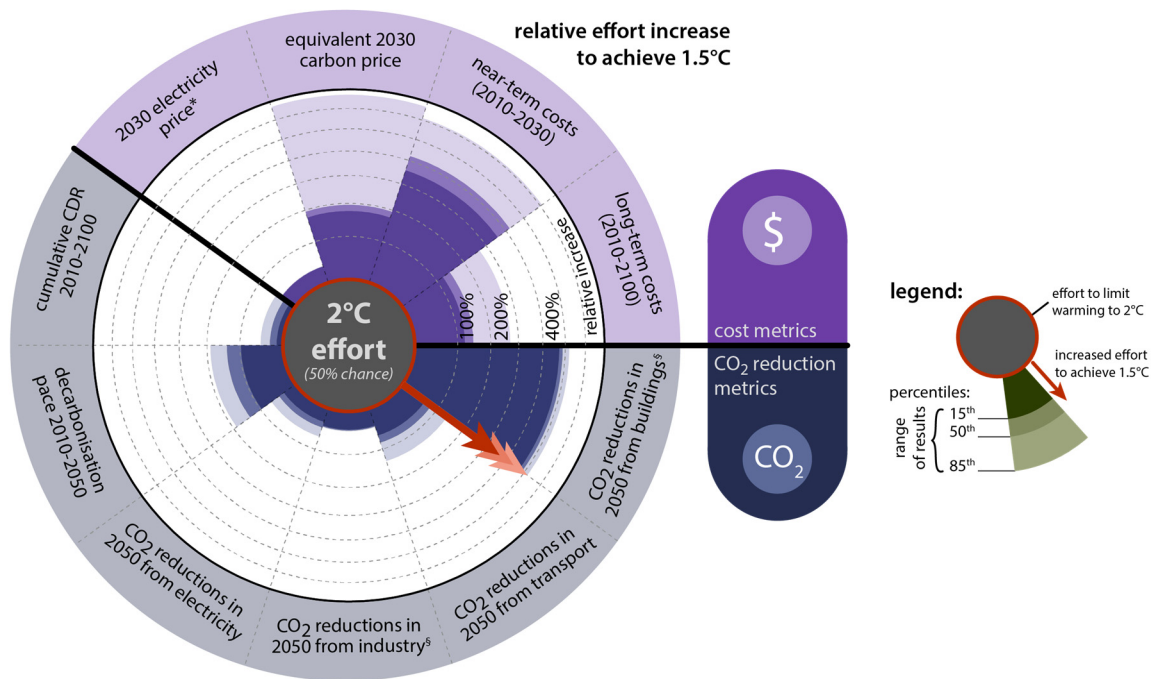

**Supplementary Figure 10 | Overview of the relative change in mitigation contributions or characteristics for 1.5°C-consistent scenarios relative to corresponding 2°C-consistent scenarios (50% chance).** Indicators are: long-term mitigation costs (2010-2100 aggregate discounted at 5%), short-term mitigation costs (2010-2030 aggregate discounted at 5%), 2030 equivalent carbon price level, electricity price in 2030, the total level of CO<sub>2</sub> removal between 2010-2100 (CDR), the decarbonisation pace (average linear 2010-2050 rate of reductions in energy-related CO<sub>2</sub> emissions), reductions in CO<sub>2</sub> emissions from electricity from baseline in 2050, reductions in CO<sub>2</sub> emission from industry from baseline in 2050, reductions in CO<sub>2</sub> emission from transport from baseline in 2050, and reductions in CO<sub>2</sub> emissions from buildings from baseline in 2050. For indicators marked with \* only REMIND provides data. For indicators marked with § only MESSAGE provides data. All changes are provided relative to the reference case of limiting warming to below 2°C with 50% chance.

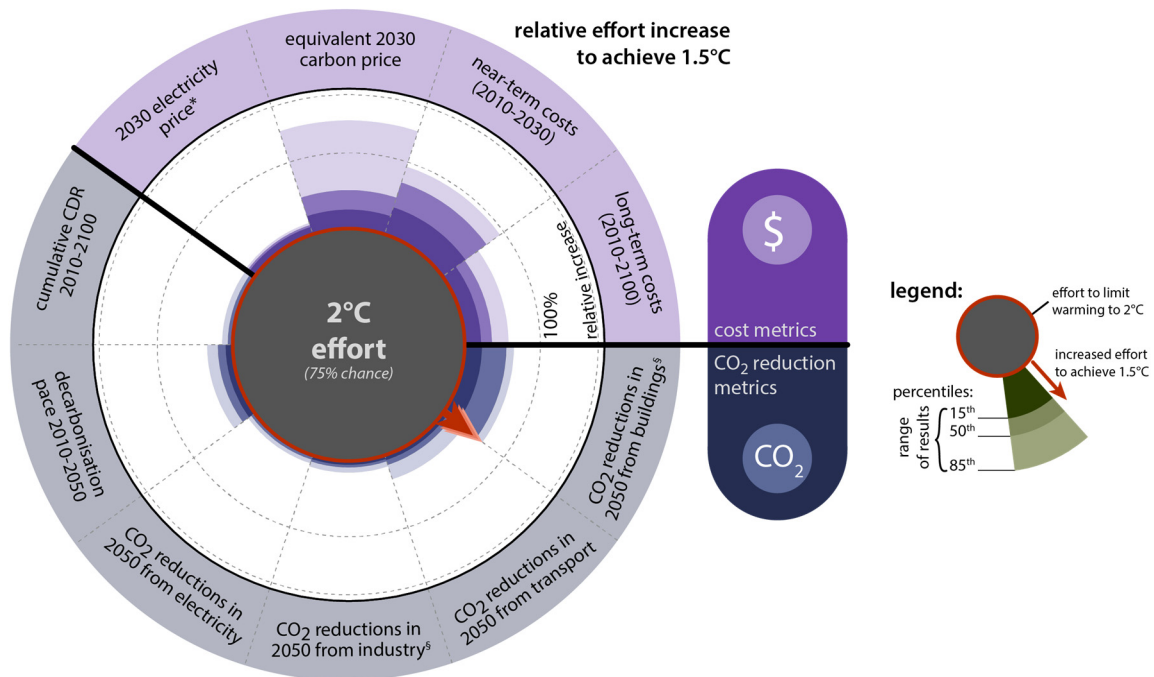

**Supplementary Figure 11 | Overview of the relative change in mitigation contributions or characteristics for 1.5°C-consistent scenarios relative to corresponding 2°C-consistent scenarios (75% chance).** Indicators are: long-term mitigation costs (2010-2100 aggregate discounted at 5%), short-term mitigation costs (2010-2030 aggregate discounted at 5%), 2030 equivalent carbon price level, electricity price in 2030, the total level of CO<sub>2</sub> removal between 2010-2100 (CDR), the decarbonisation pace (average linear 2010-2050 rate of reductions in energy-related CO<sub>2</sub> emissions), reductions in CO<sub>2</sub> emissions from electricity from baseline in 2050, reductions in CO<sub>2</sub> emission from industry from baseline in 2050, reductions in CO<sub>2</sub> emission from transport from baseline in 2050, and reductions in CO<sub>2</sub> emissions from buildings from baseline in 2050. For indicators marked with \* only REMIND provides data. For indicators marked with § only MESSAGE provides data. All changes are provided relative to the reference case of limiting warming to below 2°C with 75% chance.

## SUPPLEMENTARY TABLES

**Supplementary Table 1 | Emission characteristics of 1.5°C scenarios in our set.** Emissions scenarios that follow the 15<sup>th</sup> percentile path until 2050 are supposed to follow the 85<sup>th</sup> percentile path from 2050 until 2100 in order to remain consistent with 1.5°C.

| <i>1.5°C scenarios</i>                                                                                         |                             |                  |                  |                  |                  |                  |                  |
|----------------------------------------------------------------------------------------------------------------|-----------------------------|------------------|------------------|------------------|------------------|------------------|------------------|
| Number of available scenarios: <b>37</b>                                                                       |                             |                  |                  |                  |                  |                  |                  |
| Year of annual net global CO <sub>2</sub> (including LULUCF) emissions becoming zero*: <b>2050 (2045-2060)</b> |                             |                  |                  |                  |                  |                  |                  |
| Year of annual net global Kyoto greenhouse gas emissions becoming zero*: <b>2075 (2065-2085)</b>               |                             |                  |                  |                  |                  |                  |                  |
| Global carbon budgets** (global total CO <sub>2</sub> emissions) [GtCO <sub>2</sub> ]                          |                             |                  |                  |                  |                  |                  |                  |
|                                                                                                                | <i>Time window</i>          | <i>2016-2025</i> | <i>2026-2050</i> | <i>2051-2075</i> | <i>2076-2100</i> | <i>2011-2050</i> | <i>2011-2100</i> |
|                                                                                                                | 15 <sup>th</sup> percentile | 257              | 235              | -242             | -356             | 679              | 199              |
|                                                                                                                | <b>median</b>               | <b>288</b>       | <b>309</b>       | <b>-138</b>      | <b>-341</b>      | <b>797</b>       | <b>350</b>       |
|                                                                                                                | 85 <sup>th</sup> percentile | 352              | 377              | -64              | -289             | 895              | 415              |
| Annual emissions of all Kyoto greenhouse gases** (Kyoto-GHG - GWP-100 weighted) [GtCO <sub>2</sub> e/yr]       |                             |                  |                  |                  |                  |                  |                  |
|                                                                                                                | <i>Year</i>                 | <i>2020</i>      | <i>2025</i>      | <i>2030</i>      | <i>2050</i>      | <i>2100</i>      |                  |
|                                                                                                                | minimum                     | 31               | 31               | 26               | 4                | -10              |                  |
|                                                                                                                | 15 <sup>th</sup> percentile | 38               | 33               | 28               | 6                | -6               |                  |
|                                                                                                                | <b>median</b>               | <b>41</b>        | <b>37</b>        | <b>33</b>        | <b>13</b>        | <b>-5</b>        |                  |
|                                                                                                                | 85 <sup>th</sup> percentile | 50               | 43               | 36               | 16               | -3               |                  |
|                                                                                                                | maximum                     | 56               | 49               | 40               | 19               | -2               |                  |
| * Rounded to nearest 5 years. Format: median (15 <sup>th</sup> percentile – 85 <sup>th</sup> percentile)       |                             |                  |                  |                  |                  |                  |                  |
| ** Rounded to nearest GtCO <sub>2</sub> or GtCO <sub>2</sub> e/yr                                              |                             |                  |                  |                  |                  |                  |                  |

**Supplementary Table 2 | Emission characteristics of likely 2°C scenarios in our set.** Emissions scenarios that follow the 15<sup>th</sup> percentile path until 2050 are supposed to follow the 85<sup>th</sup> percentile path from 2050 until 2100 in order to remain consistent with a *likely* (>66%) chance of limiting warming the below 2°C. Note that the set of *likely 2°C scenarios* is explicitly excluding scenarios that would be stringent enough as to fall in the *1.5°C scenario* subset.

| <b>Likely 2°C scenarios</b>                                                                                    |                  |                  |                  |                  |                  |                  |
|----------------------------------------------------------------------------------------------------------------|------------------|------------------|------------------|------------------|------------------|------------------|
| Number of available scenarios: <b>72</b>                                                                       |                  |                  |                  |                  |                  |                  |
| Year of annual net global CO <sub>2</sub> (including LULUCF) emissions becoming zero*: <b>2065 (2060-2070)</b> |                  |                  |                  |                  |                  |                  |
| Year of annual net global Kyoto greenhouse gas emissions becoming zero*: <b>2090 (2085-after 2100)</b>         |                  |                  |                  |                  |                  |                  |
| <b>Global carbon budgets** (global total CO<sub>2</sub> emissions) [GtCO<sub>2</sub>]</b>                      |                  |                  |                  |                  |                  |                  |
| <i>Time window</i>                                                                                             | <i>2016-2025</i> | <i>2026-2050</i> | <i>2051-2075</i> | <i>2076-2100</i> | <i>2011-2050</i> | <i>2011-2100</i> |
| 15 <sup>th</sup> percentile                                                                                    | 283              | 362              | -32              | -306             | 739              | 322              |
| <b>median</b>                                                                                                  | <b>306</b>       | <b>454</b>       | <b>16</b>        | <b>-255</b>      | <b>895</b>       | <b>634</b>       |
| 85 <sup>th</sup> percentile                                                                                    | 363              | 538              | 80               | -115             | 1029             | 855              |
| <b>Annual emissions of all Kyoto greenhouse gases** (Kyoto-GHG – GWP-100 weighted) [GtCO<sub>2</sub>e/yr]</b>  |                  |                  |                  |                  |                  |                  |
| <i>Year</i>                                                                                                    | <i>2020</i>      | <i>2025</i>      | <i>2030</i>      | <i>2050</i>      | <i>2100</i>      |                  |
| minimum                                                                                                        | 36               | 31               | 26               | 9                | -10              |                  |
| 15 <sup>th</sup> percentile                                                                                    | 40               | 36               | 32               | 18               | -6               |                  |
| <b>median</b>                                                                                                  | <b>44</b>        | <b>40</b>        | <b>37</b>        | <b>20</b>        | <b>-3</b>        |                  |
| 85 <sup>th</sup> percentile                                                                                    | 49               | 45               | 40               | 23               | 4                |                  |
| maximum                                                                                                        | 56               | 58               | 60               | 26               | 12               |                  |
| * Rounded to nearest 5 years. Format: median (15 <sup>th</sup> percentile – 85 <sup>th</sup> percentile)       |                  |                  |                  |                  |                  |                  |
| ** Rounded to nearest GtCO <sub>2</sub> or GtCO <sub>2</sub> e/yr                                              |                  |                  |                  |                  |                  |                  |

**Supplementary Table 3 | Emission characteristics of medium 2°C scenarios in our set.** Emissions scenarios that follow the 15<sup>th</sup> percentile path until 2050 are supposed to follow the 85<sup>th</sup> percentile path from 2050 until 2100 in order to remain consistent with a *medium* (50-66%) chance of limiting warming the below 2°C.

| <b>Medium 2°C scenarios</b>                                                                                    |                  |                  |                  |                  |                  |                  |
|----------------------------------------------------------------------------------------------------------------|------------------|------------------|------------------|------------------|------------------|------------------|
| Number of available scenarios: <b>124</b>                                                                      |                  |                  |                  |                  |                  |                  |
| Year of annual net global CO <sub>2</sub> (including LULUCF) emissions becoming zero*: <b>2070 (2065-2075)</b> |                  |                  |                  |                  |                  |                  |
| Year of annual net global Kyoto greenhouse gas emissions becoming zero*: <b>2095 (2085-after 2100)</b>         |                  |                  |                  |                  |                  |                  |
| <b>Global carbon budgets** (global total CO<sub>2</sub> emissions) [GtCO<sub>2</sub>]</b>                      |                  |                  |                  |                  |                  |                  |
| <i>Time window</i>                                                                                             | <i>2016-2025</i> | <i>2026-2050</i> | <i>2051-2075</i> | <i>2076-2100</i> | <i>2011-2050</i> | <i>2011-2100</i> |
| 15 <sup>th</sup> percentile                                                                                    | 311              | 505              | 35               | -287             | 990              | 862              |
| <b>median</b>                                                                                                  | <b>336</b>       | <b>589</b>       | <b>136</b>       | <b>-213</b>      | <b>1107</b>      | <b>1026</b>      |
| 85 <sup>th</sup> percentile                                                                                    | 395              | 674              | 200              | -61              | 1226             | 1283             |
| <b>Annual emissions of all Kyoto greenhouse gases** (Kyoto-GHG – GWP-100 weighted) [GtCO<sub>2</sub>e/yr]</b>  |                  |                  |                  |                  |                  |                  |
| <i>Year</i>                                                                                                    | <i>2020</i>      | <i>2025</i>      | <i>2030</i>      | <i>2050</i>      | <i>2100</i>      |                  |
| minimum                                                                                                        | 35               | 35               | 35               | 17               | -9               |                  |
| 15 <sup>th</sup> percentile                                                                                    | 44               | 41               | 38               | 23               | -5               |                  |
| <b>median</b>                                                                                                  | <b>47</b>        | <b>44</b>        | <b>42</b>        | <b>26</b>        | <b>-2</b>        |                  |
| 85 <sup>th</sup> percentile                                                                                    | 55               | 49               | 46               | 30               | 5                |                  |
| maximum                                                                                                        | 57               | 60               | 63               | 34               | 16               |                  |
| * Rounded to nearest 5 years. Format: median (15 <sup>th</sup> percentile – 85 <sup>th</sup> percentile)       |                  |                  |                  |                  |                  |                  |
| ** Rounded to nearest GtCO <sub>2</sub> or GtCO <sub>2</sub> e/yr                                              |                  |                  |                  |                  |                  |                  |

**Supplementary Table 4 | Overview scenario names.** Definition of scenario labels shown in Supplementary Figure 3. More detail can be found in the original publications referenced below. Scenarios marked with \* highlight scenario setups included for the computation of the ranges in Figure 5. Scenarios marked with § are exclusively used for Supplementary Figure 5 and not in Supplementary Figure 3.

| Scenario label              | Description                                                                                                                                                                                                                                                                                                                                                                                                  |
|-----------------------------|--------------------------------------------------------------------------------------------------------------------------------------------------------------------------------------------------------------------------------------------------------------------------------------------------------------------------------------------------------------------------------------------------------------|
| M1-L-BC*                    | Scenario created with the MESSAGE model and originally published and described in Ref. 1. Assumes a full portfolio of mitigation technologies (BC: base case) and a high energy-efficient future resulting in a low energy demand (L).                                                                                                                                                                       |
| M1-L-Adv-nCO <sub>2</sub> * | Scenario created with the MESSAGE model and originally published and described in Ref. 1. Assumes a full portfolio of mitigation technologies and a high energy-efficient future resulting in a low energy demand (L). This scenario additionally assumes continued improvements over the course of the century in the mitigation potential of non-CO <sub>2</sub> greenhouse gases (Adv-nCO <sub>2</sub> ). |
| M1-L-NucPO*                 | Scenario created with the MESSAGE model and originally published and described in Ref. 1. Assumes a high energy-efficient future resulting in a low energy demand (L), and a phase-out of nuclear power generation over the coming decades (NucPO).                                                                                                                                                          |
| M1-L-LimBio§                | Scenario created with the MESSAGE model and originally published and described in Ref. 1. Assumes a high energy-efficient future resulting in a low energy demand (L), and a limited availability of bioenergy due to sustainability concerns (LimBio).                                                                                                                                                      |
| M2-lowEI                    | Scenario created with the MESSAGE model and originally published and described in Ref. 2. Assumes a full portfolio of mitigation technologies and a high energy-efficient future resulting in a low energy demand (lowEI).                                                                                                                                                                                   |
| M2-AdvTr                    | Scenario created with the MESSAGE model and originally published and described in Ref. 2. Assumes a full portfolio of mitigation technologies, an intermediate future energy demand, and an advanced electrification of the transport sector (AdvTr).                                                                                                                                                        |
| M2-Adv-nCO <sub>2</sub>     | Scenario created with the MESSAGE model and originally published and described in Ref. 2. Assumes a full portfolio of mitigation technologies, an intermediate future energy demand, and continued improvements over the course of the century in the mitigation potential of non-CO <sub>2</sub> greenhouse gases (Adv-nCO <sub>2</sub> ).                                                                  |
| R-Def*                      | Scenario created with the REMIND model and originally published and described in Ref. 3. Assumes a full portfolio of mitigation technologies and an intermediate future energy demand (Def: default).                                                                                                                                                                                                        |
| R-lowEI*                    | Scenario created with the REMIND model and originally published and described in Ref. 3. Assumes a full portfolio of mitigation technologies and a high energy-efficient future resulting in a low energy demand (lowEI).                                                                                                                                                                                    |
| R-NucPO*                    | Scenario created with the REMIND model and originally published and described in Ref. 3. Assumes a high energy-efficient future resulting in a low energy demand, and a phase-out of nuclear power generation over the coming decades (NucPO).                                                                                                                                                               |
| R-LimSW*                    | Scenario created with the REMIND model and originally published and described in Ref. 3. Assumes the renewable energy potential of wind and solar power to be limited (LimSW), and an intermediate future energy demand.                                                                                                                                                                                     |



# SUPPLEMENTARY TEXT 1

## RELATIONSHIP TO IPCC AR5 1.5°C ASSESSMENT

The Working Group III Contribution to the Fifth Assessment Report<sup>4</sup> (AR5 WGIII) of the Intergovernmental Panel on Climate Change (IPCC) only includes a limited assessment of scenarios that return warming to below 1.5°C. The report<sup>5</sup> provides a brief qualitative discussion and very limited quantitative information of the characteristics of 1.5°C scenarios based on an assessment of studies available in the literature<sup>1-3</sup>. However, the 1.5°C scenarios from these studies were not contributed to the IPCC AR5 WGIII scenario database on which the IPCC AR5 WGIII's quantitative assessment of mitigation pathways relied\*. There are several reasons for this. First, the database was populated on a voluntary basis. Second, the AR5 database received major contributions from large-scale integrated assessment modelling intercomparison (IAM) experiments (for example, from Refs. 6-18), and modelling teams often refrained from contributing additional scenarios from single-model studies that were carried out (like those reported in Refs. 1-3). Since the IAM intercomparison exercises did not attempt to produce scenarios towards limiting warming below 1.5°C, almost none were reported to the AR5 database. Third, from some additional studies<sup>19,20</sup> which also looked at the question of 1.5°C with other modelling frameworks, no scenarios were contributed into the AR5 database.

Scenarios in the IPCC AR5 WGIII assessment were grouped based on their concentration rather than their temperature outcome. This eases comparability with the results for the representative concentration pathways<sup>21-23</sup> (RCP) across IPCC working groups. However, at the same time it complicates the interpretation of AR5 WGIII results in terms of keeping warming below specific temperature limits, in particular 1.5°C, for which no specific corresponding concentration category (or RCP) is available. The lowest scenario category of the IPCC AR5 WGIII report corresponds to a *likely* chance<sup>24</sup> (>66%) of limiting warming to below 2°C, and is not explicit about options for limiting warming to below 1.5°C with a compelling probability.

| <b>Comparison of 1.5°C scenario results from IPCC AR5 and from this study</b> |                                                                                                                                                                                                    |                                                                                                                                                     |
|-------------------------------------------------------------------------------|----------------------------------------------------------------------------------------------------------------------------------------------------------------------------------------------------|-----------------------------------------------------------------------------------------------------------------------------------------------------|
|                                                                               | <b>IPCC AR5</b>                                                                                                                                                                                    | <b>This study</b>                                                                                                                                   |
| Methodology                                                                   | 10 <sup>th</sup> to 90 <sup>th</sup> percentile ranges of scenarios limiting warming to below 1.5°C by 2100 with at least 60%, separately received from earlier published studies <sup>1-3</sup> . | 15 <sup>th</sup> to 85 <sup>th</sup> percentile ranges of scenarios limiting warming to below 1.5°C by 2100 with at least 50%, in our scenario set. |
| Cumulative CO <sub>2</sub> 2011-2050                                          | 655–815 GtCO <sub>2</sub>                                                                                                                                                                          | 680-895 GtCO <sub>2</sub>                                                                                                                           |
| Cumulative CO <sub>2</sub> 2011-2100                                          | 90–350 GtCO <sub>2</sub>                                                                                                                                                                           | 200-415 GtCO <sub>2</sub>                                                                                                                           |
| Global CO <sub>2</sub> e emission reductions from 2010 levels in 2050         | 70-95%                                                                                                                                                                                             | 66-88%                                                                                                                                              |
| Global CO <sub>2</sub> e emission reductions from 2010 levels in 2100         | 110-120%                                                                                                                                                                                           | 107-113%                                                                                                                                            |

\* Hosted at the International Institute for Applied Systems Analysis – IIASA, and available at: <https://secure.iiasa.ac.at/web-apps/ene/AR5DB>

## SUPPLEMENTARY REFERENCES

1. Rogelj J, McCollum DL, Reisinger A, Meinshausen M, Riahi K. Probabilistic cost estimates for climate change mitigation. *Nature* 2013, **493**(7430): 79-83.
2. Rogelj J, McCollum DL, O'Neill BC, Riahi K. 2020 emissions levels required to limit warming to below 2°C. *Nature Clim Change* 2013, **3**(4): 405-412.
3. Luderer G, Pietzcker RC, Bertram C, Kriegler E, Meinshausen M, Edenhofer O. Economic mitigation challenges: how further delay closes the door for achieving climate targets. *Environmental Research Letters* 2013, **8**(3): 034033.
4. IPCC. Mitigation of Climate Change. Working Group III Contribution to the Intergovernmental Panel on Climate Change Fifth Assessment Report. Cambridge, UK and New York, USA: Cambridge University Press; 2014.
5. Clarke L, Jiang K, Akimoto K, Babiker M, Blanford G, Fisher-Vanden K, *et al.* Assessing Transformation Pathways. In: Edenhofer O, Pichs-Madruga R, Sokona Y, Farahani E, Kadner S, Seyboth K, *et al.* (eds). *Climate Change 2014: Mitigation of Climate Change. Contribution of Working Group III to the Fifth Assessment Report of the Intergovernmental Panel on Climate Change*. Cambridge University Press: Cambridge, United Kingdom and New York, NY, USA, 2014.
6. Edenhofer O, Knopf B, Barker T, Baumstark L, Bellevrat E, Chateau B, *et al.* The Economics of Low Stabilization: Model Comparison of Mitigation Strategies and Costs. *The Energy Journal* 2010, **31**(Special Issue): 11-48.
7. Luderer G, Bosetti V, Jakob M, Leimbach M, Steckel J, Waisman H, *et al.* The economics of decarbonizing the energy system—results and insights from the RECIPE model intercomparison. *Climatic Change* 2012, **114**(1): 9-37.
8. Calvin K, Clarke L, Krey V, Blanford G, Jiang K, Kainuma M, *et al.* The Role of Asia in Mitigating Climate Change: Results from the Asia Modelling Exercise. *Energy Econ* 2012.
9. Luderer G, Bertram C, Calvin K, De Cian E, Kriegler E. Implications of weak near-term climate policies on long-term mitigation pathways. *Climatic Change* 2013: 1-14.
10. Kriegler E, Riahi K, *et al.* Making or breaking climate targets: The AMPERE study on staged accession scenarios for climate policy. *Technological Forecasting and Social Change* 2013, **in press**.
11. Krey V, Luderer G, Clarke L, Kriegler E. Getting from here to there – energy technology transformation pathways in the EMF27 scenarios. *Climatic Change* 2014, **123**(3-4): 369-382.
12. De Cian E, Sferra F, Tavoni M. The influence of economic growth, population, and fossil fuel scarcity on energy investments. 2013.
13. Calvin K, Wise M, Luckow P, Kyle P, Clarke L, Edmonds J. Implications of uncertain future energy resources on bioenergy use and terrestrial carbon emissions. 2013.
14. Bauer N, Mouratiadou I, Luderer G, Baumstark L, Brecha RJ, Edenhofer O, *et al.* Global Fossil Energy Markets and Climate Change Mitigation – an analysis with ReMIND. 2013.
15. Clarke L, Edmonds J, Krey V, Richels R, Rose S, Tavoni M. International climate policy architectures: Overview of the EMF 22 International Scenarios. *Energy Econ* 2009, **31**(Supplement 2): S64-S81.
16. Riahi K, Dentener F, Gielen D, Grubler A, Jewell J, Klimont Z, *et al.* Chapter 17 - Energy Pathways for Sustainable Development. *Global Energy Assessment - Toward a Sustainable Future*. Cambridge University Press, Cambridge, UK and New York, NY, USA and the International Institute for Applied Systems Analysis, Laxenburg, Austria, 2012, pp 1203-1306.
17. Riahi K, Kriegler E, Johnson N, Bertram C, den Elzen M, Eom J, *et al.* Locked into Copenhagen pledges — Implications of short-term emission targets for the cost and feasibility of long-term climate goals. *Technological Forecasting and Social Change* 2015, **90**, Part A(0): 8-23.

18. Kriegler E, Tavoni M, Aboumahboub T, Luderer G, Calvin K, Demaere G, *et al.* What does the 2°C target imply for a global climate agreement in 2020? The LIMITS study on Durban Platform Scenarios. *Climate Change Economics* 2013, **04**(04): 1340008.
19. Ranger N, Gohar L, Lowe J, Raper S, Bowen A, Ward R. Is it possible to limit global warming to no more than 1.5°C? *Climatic Change* 2012, **111**(3): 973-981.
20. Azar C, Johansson DJA, Mattsson N. Meeting global temperature targets—the role of bioenergy with carbon capture and storage. *Environmental Research Letters* 2013, **8**(3): 034004.
21. Rogelj J, Meinshausen M, Knutti R. Global warming under old and new scenarios using IPCC climate sensitivity range estimates. *Nature Clim Change* 2012, **2**(4): 248-253.
22. Moss RH, Edmonds JA, Hibbard KA, Manning MR, Rose SK, van Vuuren DP, *et al.* The next generation of scenarios for climate change research and assessment. *Nature* 2010, **463**(7282): 747-756.
23. van Vuuren D, Edmonds J, Kainuma M, Riahi K, Thomson A, Hibbard K, *et al.* The representative concentration pathways: an overview. *Climatic Change* 2011, **109**(1-2): 5-31.
24. Mastrandrea MD, Field CB, Stocker TF, Edenhofer O, Ebi KL, Frame DJ, *et al.* Guidance Notes for Lead Authors of the IPCC Fifth Assessment Report on Consistent Treatment of Uncertainties. IPCC; 2010. p. 5.
